# Supplementary material for: High-Density Dielectrophoretic Microwell Array for Detection, Capture, and Single-Cell Analysis of Rare Tumor Cells in Peripheral Blood
Source: PubMed Central journal article supplement (PMC4480363; doi:10.1371/journal.pone.0130418), 2015-06-24
Supplement: pone.0130418.s001.pdf [file pone.0130418.s001.pdf]

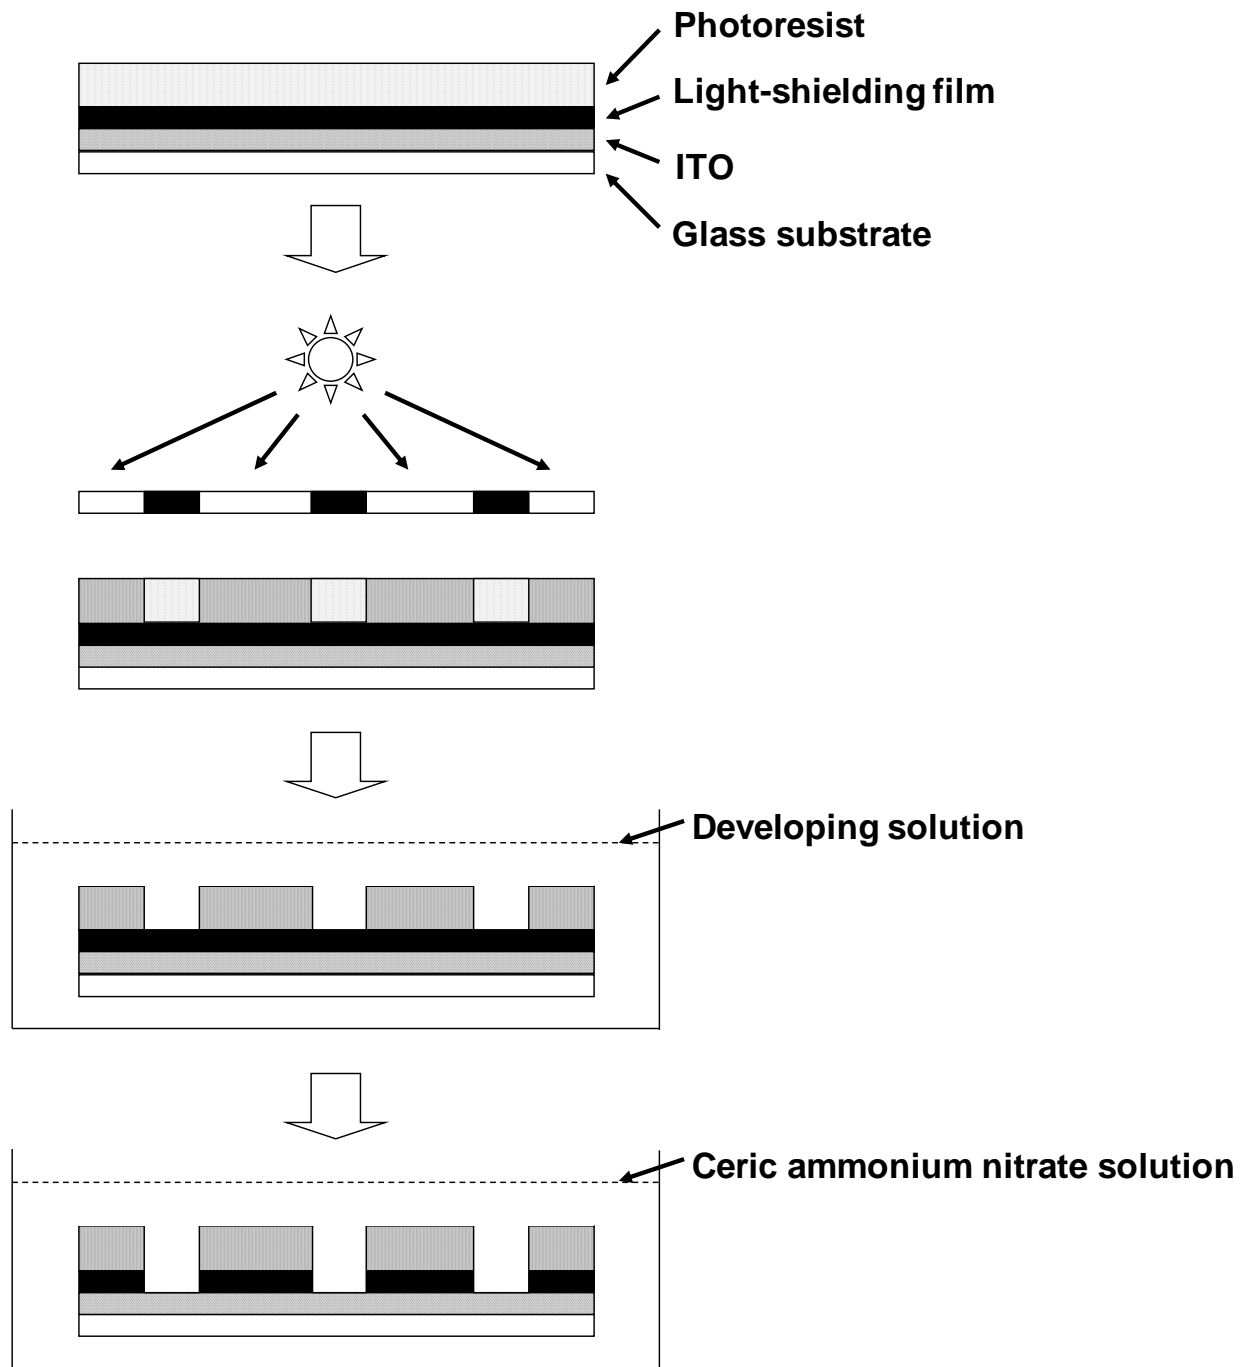

**S1 Fig. Schematic Diagram of the Photolithographic Method, with Corresponding Etching, to Fabricate the Microwell Array Substrate.**
