# Supplementary material for: High-Density Dielectrophoretic Microwell Array for Detection, Capture, and Single-Cell Analysis of Rare Tumor Cells in Peripheral Blood
Source: PubMed Central journal article supplement (PMC4480363; doi:10.1371/journal.pone.0130418), 2015-06-24
Supplement: pone.0130418.s006.pdf [file pone.0130418.s006.pdf]

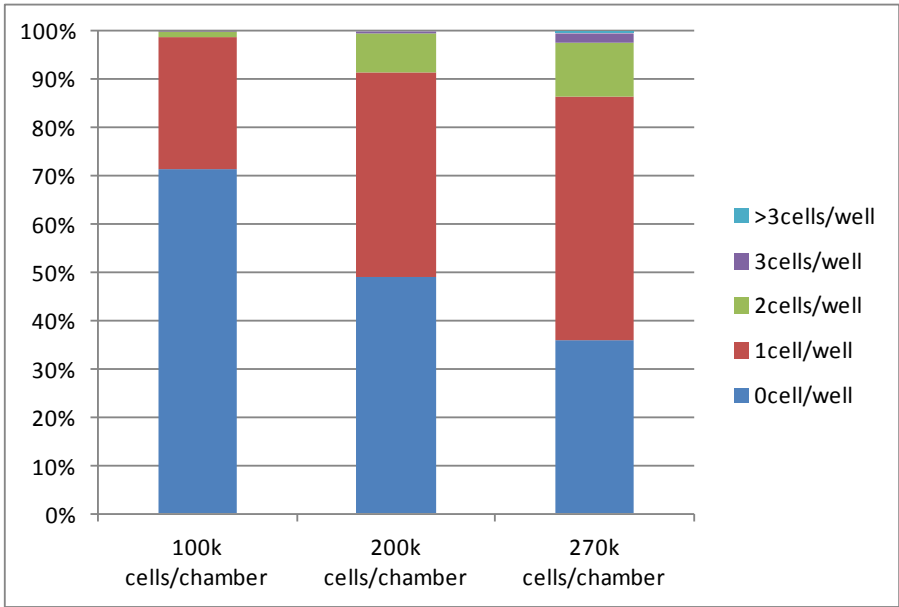

**S6 Fig. Number of White Blood Cells per Microwell as a Percentage of the Total Number of Microwells.**
