# Supplementary material for: High-Density Dielectrophoretic Microwell Array for Detection, Capture, and Single-Cell Analysis of Rare Tumor Cells in Peripheral Blood
Source: PubMed Central journal article supplement (PMC4480363; doi:10.1371/journal.pone.0130418), 2015-06-24
Supplement: pone.0130418.s008.pdf [file pone.0130418.s008.pdf]

**S2 Table. Results of Spike-in Experiments.**

| Cell line               | Cell number set        | Number of spiked cells / 3 mL blood | Number of detected cells | Detection rate (%) | Mean detection rate (%) | CV (%) |
|-------------------------|------------------------|-------------------------------------|--------------------------|--------------------|-------------------------|--------|
| SK-BR-3                 | 10 cells*              | 9                                   | 7                        | 77.8               | 90.0                    | 12.5   |
|                         |                        | 13                                  | 12                       | 92.3               |                         |        |
|                         |                        | 9                                   | 9                        | 100.0              |                         |        |
|                         | 100 cells*             | 96                                  | 78                       | 81.3               | 70.6                    | 20.2   |
|                         |                        | 80                                  | 61                       | 76.3               |                         |        |
|                         |                        | 103                                 | 56                       | 54.4               |                         |        |
|                         | 1000 cells*            | 1000                                | 693                      | 69.3               | /                       | /      |
|                         |                        | 1000                                | 897                      | 89.7               |                         |        |
|                         |                        | 1000                                | 767                      | 76.7               |                         |        |
| PC-9                    | 10 cells*              | 12                                  | 9                        | 75.0               | 70.2                    | 18.4   |
|                         |                        | 10                                  | 8                        | 80.0               |                         |        |
|                         |                        | 9                                   | 5                        | 55.6               |                         |        |
|                         | 100 cells*             | 103                                 | 90                       | 87.4               | 85.2                    | 2.7    |
|                         |                        | 99                                  | 82                       | 82.8               |                         |        |
|                         |                        | 89                                  | 76                       | 85.4               |                         |        |
|                         | 1000 cells*            | 1000                                | 824                      | 82.4               | /                       | /      |
|                         |                        | 1000                                | 815                      | 81.5               |                         |        |
|                         |                        | 1000                                | 1420                     | 142.0              |                         |        |
| PC-14                   | 10 cells <sup>#</sup>  | 11                                  | 7                        | 63.6               | 63.3                    | 26.8   |
|                         |                        | 10                                  | 8                        | 80.0               |                         |        |
|                         |                        | 13                                  | 6                        | 46.2               |                         |        |
|                         | 100 cells*             | 106                                 | 17                       | 16.0               | 13.9                    | /      |
|                         |                        | 111                                 | 13                       | 11.7               |                         |        |
|                         |                        | 105                                 | 75                       | 71.4               |                         |        |
|                         | 100 cells <sup>#</sup> | 100                                 | 75                       | 75.0               | 68.6                    | 24.7   |
|                         |                        | 113                                 | 67                       | 59.3               |                         |        |
|                         |                        | 1000                                | 1053                     | 100.0              |                         |        |
| H69                     | 10 cells <sup>#</sup>  | 9                                   | 7                        | 77.8               | 70.1                    | 10.9   |
|                         |                        | 8                                   | 5                        | 62.5               |                         |        |
|                         |                        | 10                                  | 7                        | 70.0               |                         |        |
|                         | 100 cells*             | 96                                  | 3                        | 3.1                | 6.4                     | /      |
|                         |                        | 103                                 | 10                       | 9.7                |                         |        |
|                         |                        | 103                                 | 69                       | 67.0               |                         |        |
|                         | 100 cells <sup>#</sup> | 114                                 | 70                       | 61.4               | 72.7                    | 10.5   |
|                         |                        | 98                                  | 88                       | 89.8               |                         |        |
|                         |                        | 1000                                | 889                      | 88.9               |                         |        |
| 1000 cells <sup>#</sup> | 1000                   | 616                                 | 61.6                     | /                  | /                       |        |
|                         | 1000                   | 242                                 | 24.2                     |                    |                         |        |
|                         | 1000                   | 242                                 | 24.2                     |                    |                         |        |
| SBC-3                   | 10 cells <sup>#</sup>  | 11                                  | 6                        | 54.5               | 50.2                    | 8.4    |
|                         |                        | 13                                  | 6                        | 46.2               |                         |        |
|                         |                        | 10                                  | 5                        | 50.0               |                         |        |
|                         | 100 cells*             | 91                                  | 0                        | 0.0                | 3.0                     | /      |
|                         |                        | 101                                 | 6                        | 5.9                |                         |        |
|                         |                        | 98                                  | 57                       | 58.2               |                         |        |
|                         | 100 cells <sup>#</sup> | 93                                  | 58                       | 62.4               | 55.9                    | 7.5    |
|                         |                        | 93                                  | 44                       | 47.3               |                         |        |
|                         |                        | 1000                                | 535                      | 53.5               |                         |        |
| 1000 cells <sup>#</sup> | 1000                   | 544                                 | 54.4                     | /                  | /                       |        |
|                         | 1000                   | 544                                 | 54.4                     |                    |                         |        |

Immunofluorescent protocol utilizing:

\* : fluorophore-conjugated primary anti-CK antibody

# : primary anti-CK antibody and fluorophore-conjugated secondary antibody
