# Supplementary material for: High-Density Dielectrophoretic Microwell Array for Detection, Capture, and Single-Cell Analysis of Rare Tumor Cells in Peripheral Blood
Source: PLOS journal article supplement (doi:10.1371/journal.pone.0130418), 2015-06-24
Supplement: S5 (10.1371/journal.pone.0130418.s005) [file journal.pone.0130418.s005]

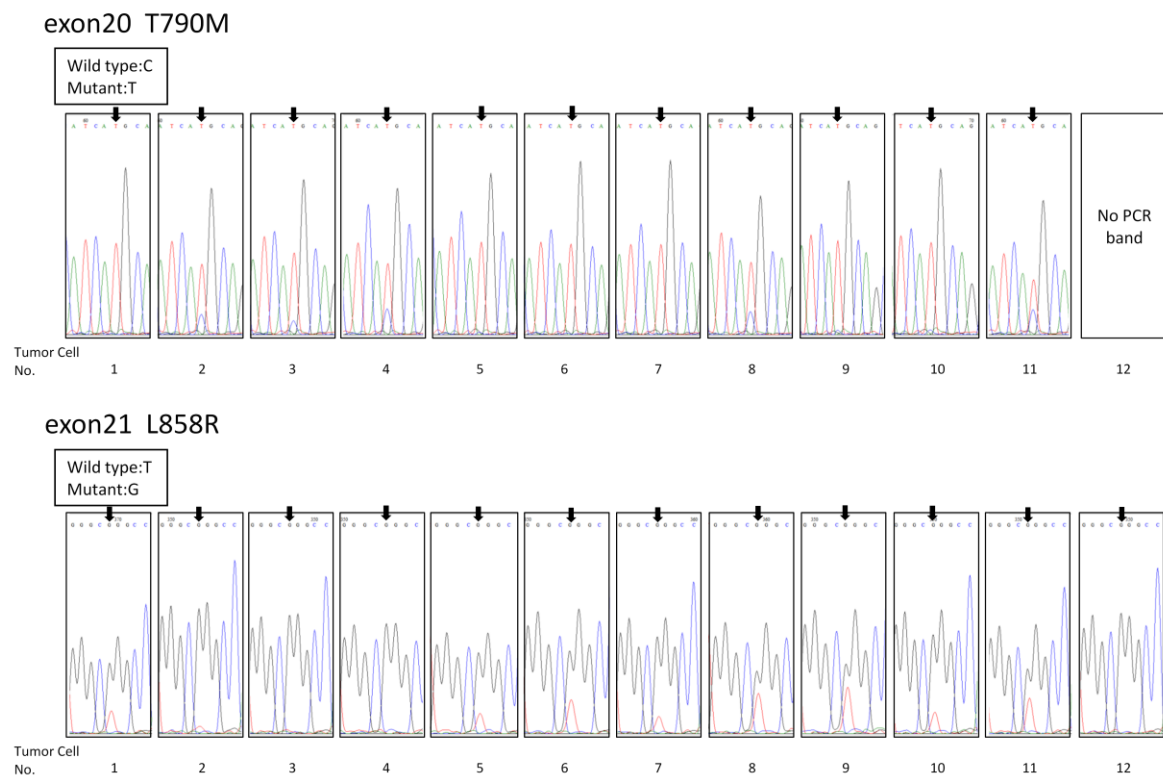

**S5 Fig. Sequencing Chromatograms with T790M *EGFR* exon 20 Mutation and L858R *EGFR* exon 21 Mutation Obtained from WGA Product from 12 Single H1975 cells Isolated by our CTC Detection System.**
